# Supplementary material for: How do diverse low-income and middle-income countries implement primary healthcare team integration to support the delivery of comprehensive primary health care? A mixed-methods study protocol from India, Mexico and Uganda
Source: HighWire-hosted journal article supplement (doi:10.1136/bmjopen-2021-055218), 2022-05-01
Supplement: bmjopen-2021-055218supp002_data_supplement.pdf [file bmjopen-2021-055218supp002_data_supplement.pdf]

## In-depth interview guide with health care workers working in the primary healthcare facilities

| Main question/exploratory questions                                                                                                                                 | Probing questions                                                                                                                                                                                                                    |
|---------------------------------------------------------------------------------------------------------------------------------------------------------------------|--------------------------------------------------------------------------------------------------------------------------------------------------------------------------------------------------------------------------------------|
| <b>Role and recruitment</b><br>In your opinion, what kind of strategies are needed to ensure delivery of comprehensive primary health care?                         | What is your view about the role of Community Health Workers in chronic disease control?                                                                                                                                             |
| <b>Training</b><br>What is your view about Community Health Workers' training?                                                                                      | Do you think Community Health Workers have sufficient knowledge and skill to implement comprehensive primary health care?                                                                                                            |
| <b>Equipment and Supplies</b><br>Do you think there is enough equipment and supplies to adequately manage acute and chronic diseases at Primary Health Centre level | Are protocols, guidelines for the chronic disease programs adequately implemented?<br><br>What are the challenges to improving adherence to guidelines and protocols?<br><br>What kind of equipment and supplies should be provided? |
| <b>Supervision</b><br>What is your view of the Community Health Workers supervision process?                                                                        | What is your/your facilities role in the Community Health Workers' supervision?<br><br>What kind of supervision should be in place for Community Health Workers to strengthen the delivery of comprehensive primary health care?     |
| <b>Incentives</b><br>What factors do you think influence Community Health Workers to remain in or leave their job?                                                  | Administrative reasons, financial reasons, social reasons                                                                                                                                                                            |
| <b>Community Involvement</b> How involved is the community in the management of the Health Facility?                                                                | Why/ why not?                                                                                                                                                                                                                        |

|                                                                                                                                                                                                      |                                                                                                                                                                             |
|------------------------------------------------------------------------------------------------------------------------------------------------------------------------------------------------------|-----------------------------------------------------------------------------------------------------------------------------------------------------------------------------|
| <b>Data</b><br>Are the information management systems in your facility adequate?                                                                                                                     | What is needed to overcome challenges to better information management?<br>Who is responsible for data management?<br>How are the data from your facility managed?          |
| <b>Linkages to Health System Referral System</b><br>Can you describe the referral processes?<br><br>What is the challenge for having a good linkage between the health post and the health services? | Are referral guidelines for Community Health Worker?<br><br>What would you recommend for improving linkage of services from the community to the primary healthcare system? |
| <b>Integration of chronic diseases program</b><br>How integrated are chronic disease programmes with other activities in your Primary Health Centre?                                                 | What is your recommendation for effective integration of chronic disease services in the Primary Health Centre settings?<br>What will be the challenges?                    |
